# Supplementary figures and images for: Alternative Splicing for Leucanthemella linearis NST1 Contributes to Variable Abiotic Stress Resistance in Transgenic Tobacco
Source: MDPI journal article supplement (doi:10.3390/genes14081549), 2023-07-28

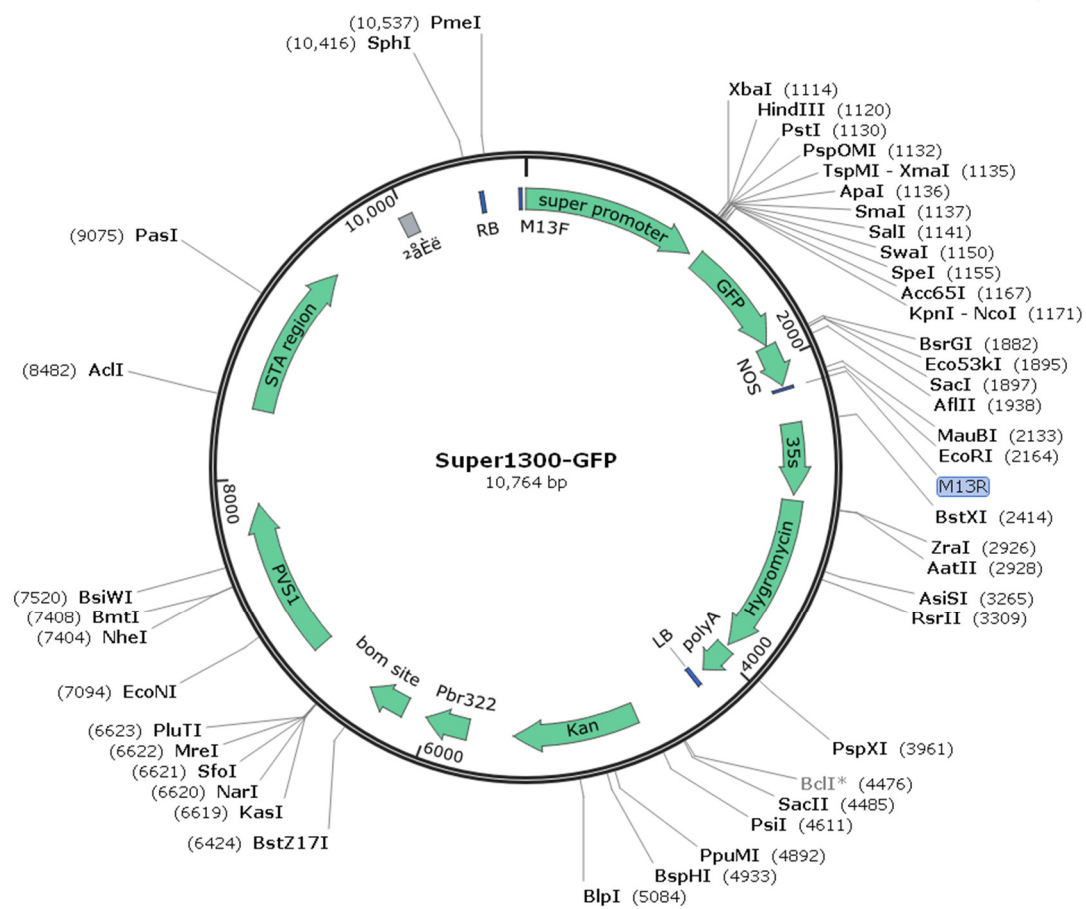

Supplement: s1 [file s1]
